# Supplementary material for: Synthesis of Mg and Zn diolates and their use in metal oxide deposition
Source: Royal Society of Chemistry journal article supplement (doi:10.1039/c9ra00585d), 2019-01-01

## Supplementary Data

### Synthesis of Mg and Zn Diolates and their Use in Metal Oxide Deposition

Peter Frenzel,<sup>a</sup> Andrea Preuß,<sup>a</sup> Jörn Bankwitz,<sup>b</sup> Colin Georgi,<sup>b</sup> Fabian Ganss,<sup>d</sup> Lutz Mertens,<sup>f</sup> Stefan E. Schulz,<sup>b,c</sup> Olav Hellwig,<sup>d,e</sup> Michael Mehring,<sup>f</sup> Heinrich Lang<sup>a\*</sup>

a) Technische Universität Chemnitz, Faculty of Natural Sciences, Institute of Chemistry, Inorganic Chemistry, D–09107 Chemnitz, Germany

b) Fraunhofer Institute for Electronic Nano Systems (ENAS), Technologie–Campus 3, D–09126 Chemnitz, Germany

c) Technische Universität Chemnitz, Center for Microtechnologies, D–09107 Chemnitz, Germany

d) Technische Universität Chemnitz, Faculty of Natural Sciences, Institute of Physics, D–09107 Chemnitz, Germany

e) Helmholtz-Zentrum Dresden-Rossendorf, Institute of Ion Beam Physics and Materials Research, D–01328 Dresden, Germany

f) Technische Universität Chemnitz, Faculty of Natural Sciences, Institute of Chemistry, Coordination Chemistry, D–09107 Chemnitz, Germany

\*) Email: heinrich.lang@chemie.tu-chemnitz.de; Phone: +49(0)371–531–21210; Fax.: +49(0)371–531–21219.

## Table of Contents

|                                                                             |     |
|-----------------------------------------------------------------------------|-----|
| Figures S1 – S4: SEM images of layers <b>A – D</b> .....                    | S3  |
| Figures S5 – S10: EDX spectra of layers <b>A – F</b> .....                  | S5  |
| Figures S11 – S16: Survey XPS spectra of layers <b>A – F</b> .....          | S7  |
| Figures S17 – S21: Detail XPS spectra of layers <b>A, B, D – F</b> .....    | S9  |
| Figures S22 – S24: GIXRD spectra of layers <b>A – C</b> .....               | S11 |
| Table S1: Elemental composition of the surface of layers <b>A – F</b> ..... | S12 |
| NMR spectra of <b>3, 5</b> and <b>7</b> .....                               | S13 |
| IR spectra of <b>3, 5</b> and <b>7</b> .....                                | S18 |

## SEM Images

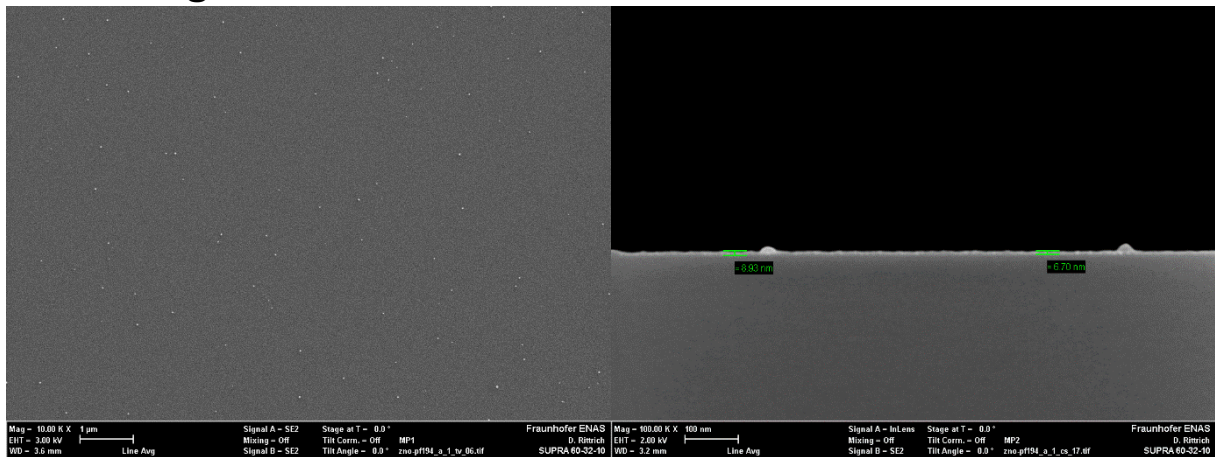

**Figure S1.** SEM images of as-deposited layer **A** (top view, left) and a cross section image (right) using **7** as CVD precursor, deposited on Si/SiO<sub>2</sub> substrates.

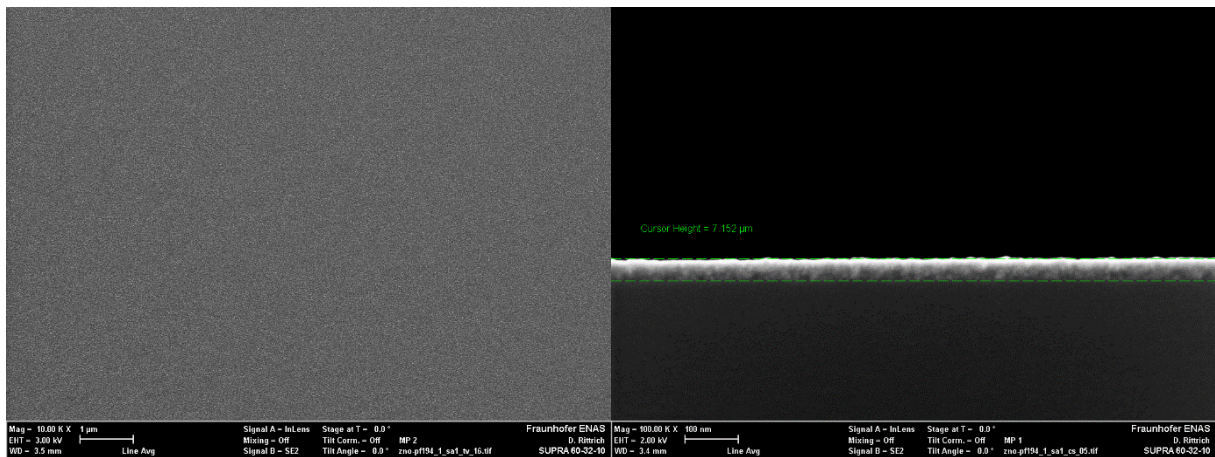

**Figure S2.** SEM images of as-deposited layer **B** (top view, left) and a cross section image (right) using **7** as CVD precursor, deposited on Si/SiO<sub>2</sub> substrates.

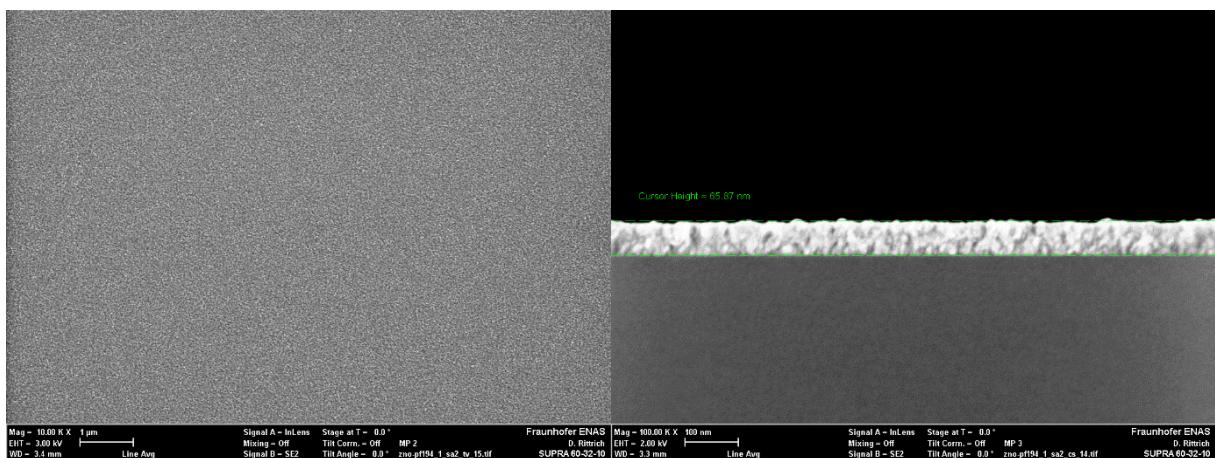

**Figure S3.** SEM images of as-deposited layer **C** (top view, left) and a cross section image (right) using **7** as CVD precursor, deposited on Si/SiO<sub>2</sub> substrates.

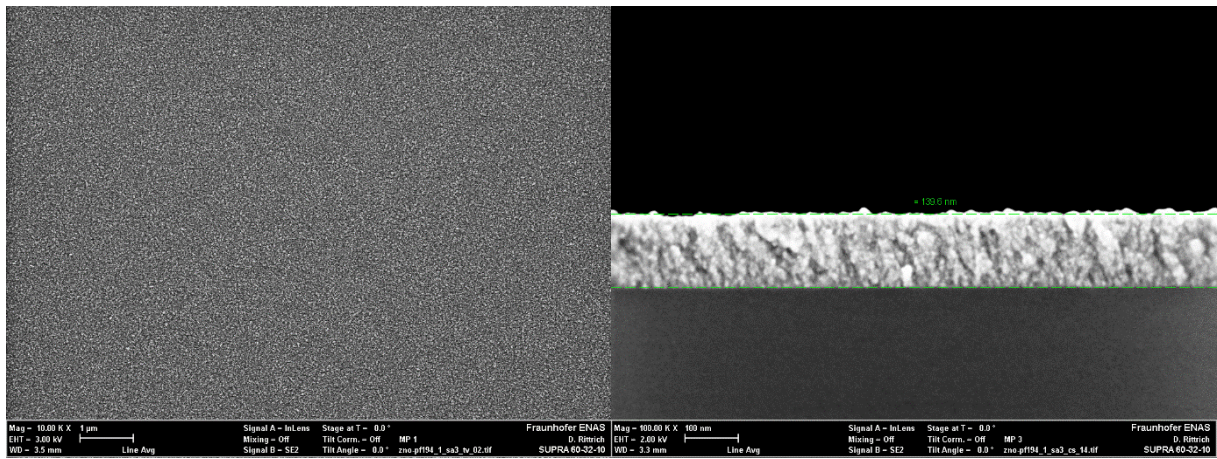

**Figure S4.** SEM images of as-deposited layer **D** (top view, left) and a cross section image (right) using **7** as CVD precursor, deposited on Si/SiO<sub>2</sub> substrates.

# EDX Spectra

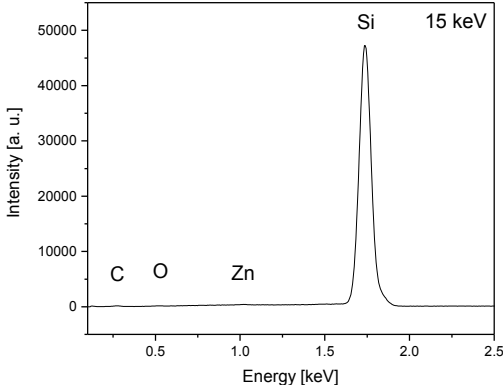

**Figure S5.** EDX spectra of layer **A** by using an electron beam energy of 15 keV obtained from **7** by CVD.

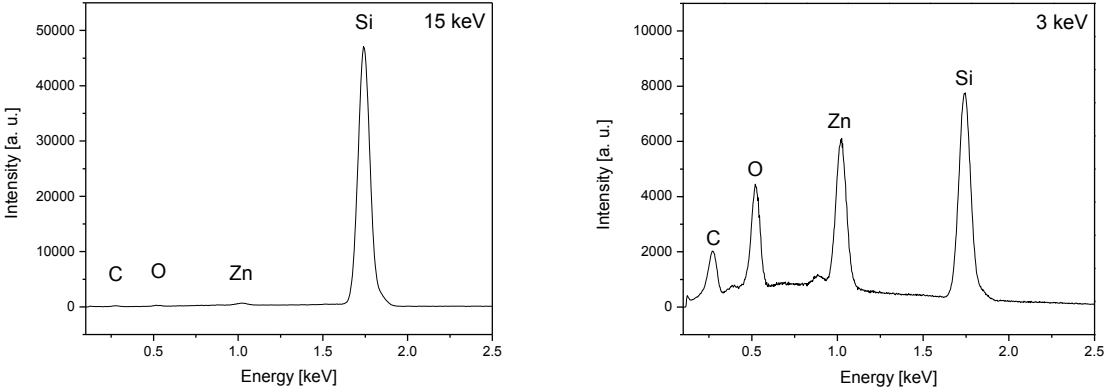

**Figure S6.** EDX spectra of layer **B** by using an electron beam energy of 15 keV (left) and 3 keV (right) obtained from **7** by CVD showing the characteristic pattern of Zn, O, C and Si.

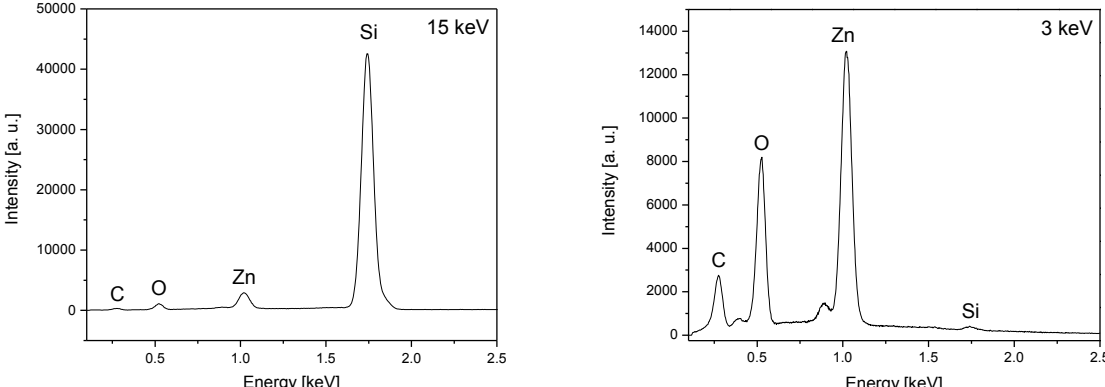

**Figure S7.** EDX spectra of layer **C** by using an electron beam energy of 15 keV (left) and 3 keV (right) obtained from **7** by CVD showing the characteristic pattern of Zn, O, C and Si.

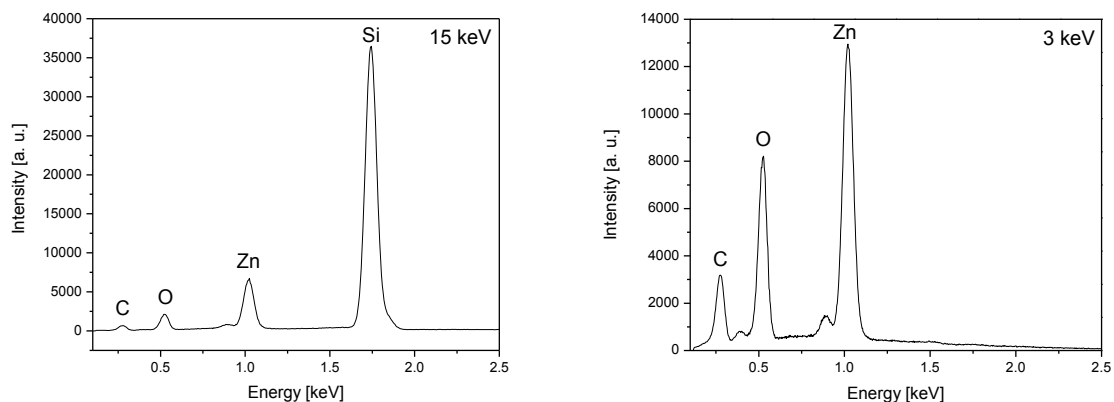

**Figure S8.** EDX spectra of layer **D** by using an electron beam energy of 15 keV (left) and 3 keV (right) obtained from **7** by CVD showing the characteristic pattern of Zn, O, C and Si.

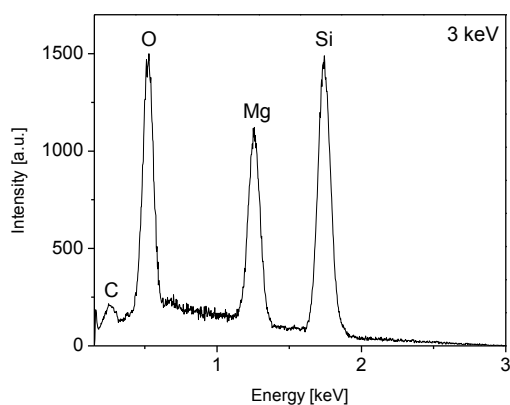

**Figure S9.** EDX spectrum of layer **E** by using an electron beam energy of 3 keV obtained from **5** by spin-coating showing the characteristic pattern of Mg, O, C and Si.

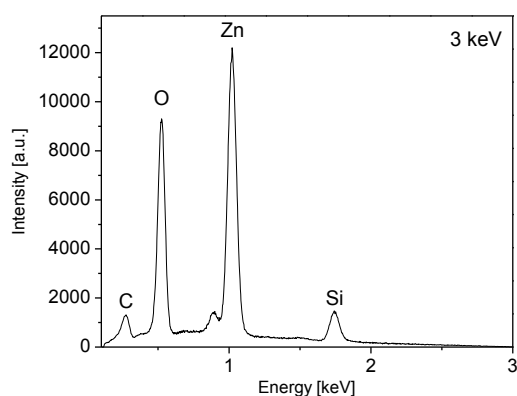

**Figure S10.** EDX spectrum of layer **F** by using an electron beam energy of 3 keV obtained from **7** by spin-coating showing the characteristic pattern of Zn, O, C and Si.

# XPS Spectra

## Survey Spectra of Layers A– F

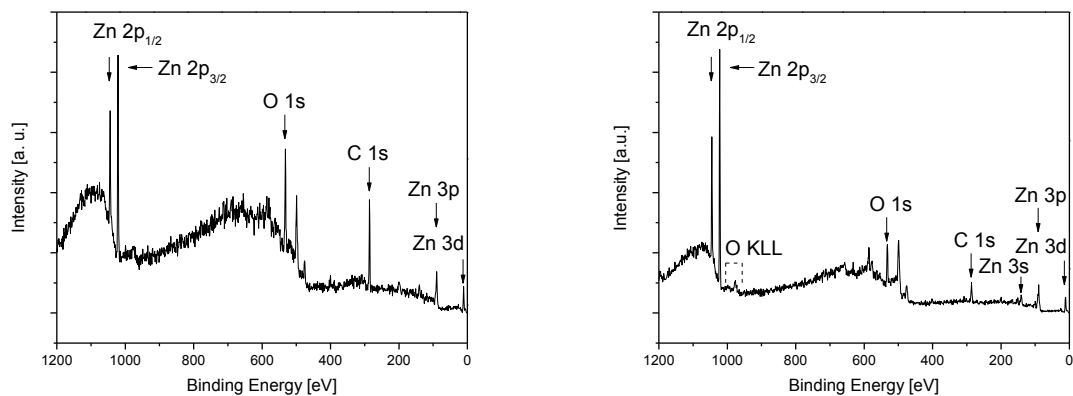

**Figure S11.** *Ex situ* XPS spectra of the surface (left) and of the film (right) of layer **A** obtained from **7** by CVD.

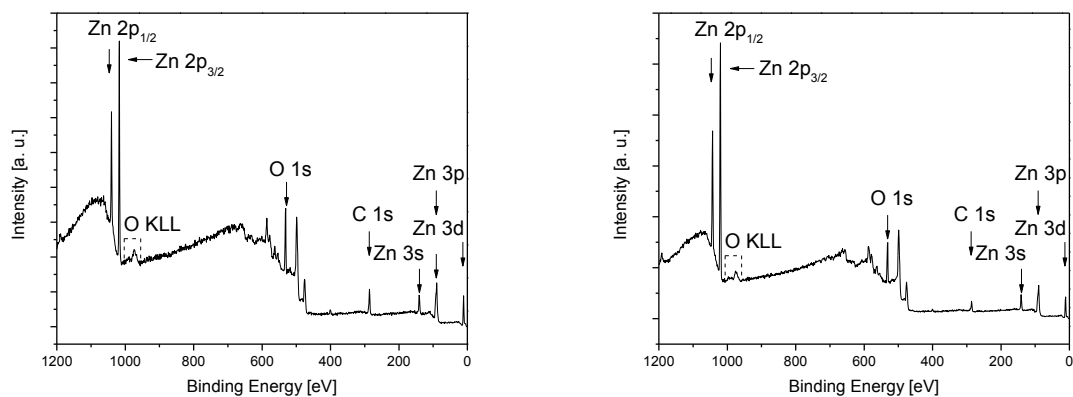

**Figure S12.** *Ex situ* XPS spectra of the surface (left) and of the film (right) of layer **B** obtained from **7** by CVD.

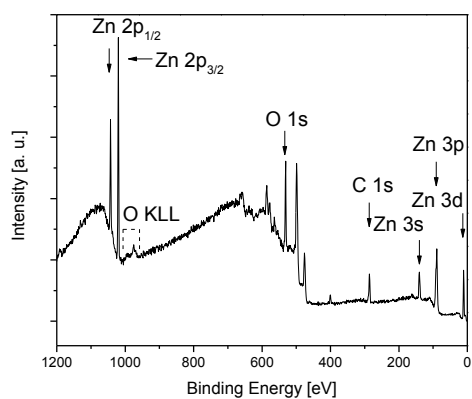

**Figure S13.** *Ex situ* XPS spectrum of the surface of layer **C** obtained from **7** by CVD.

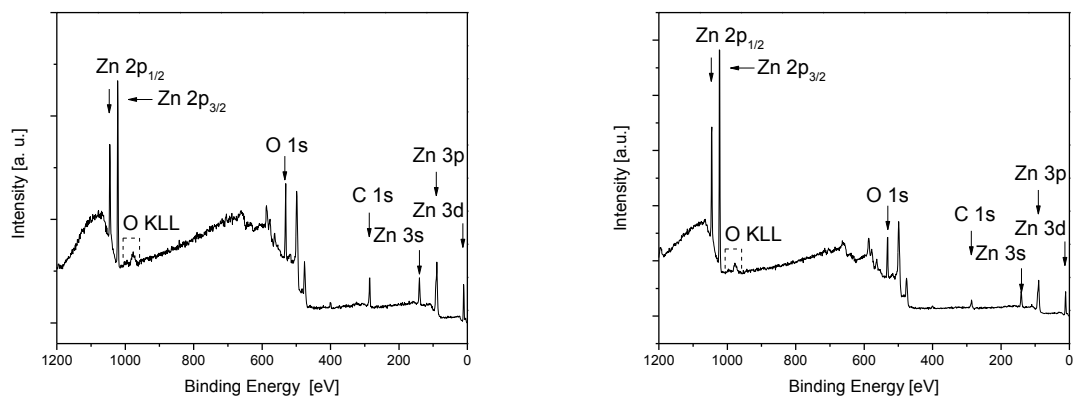

**Figure S14.** *Ex situ* XPS spectra of the surface (left) and of the film (right) of layer **D** obtained from **7** by CVD.

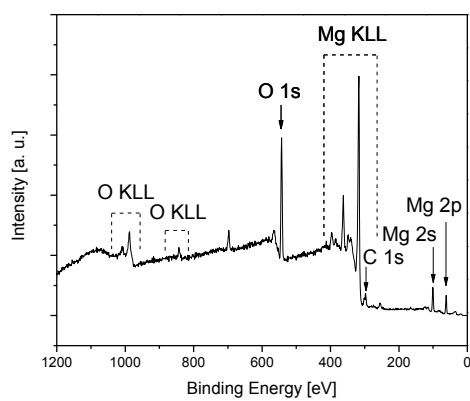

**Figure S15.** *Ex situ* XPS spectrum of the surface of layer **E** obtained from **5** by spin-coating.

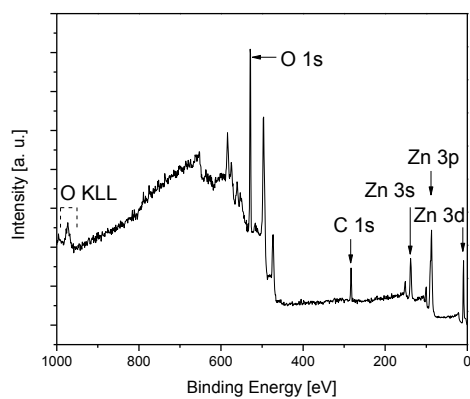

**Figure S16.** *Ex situ* XPS spectrum of the surface of layer **F** obtained from **7** by spin-coating.



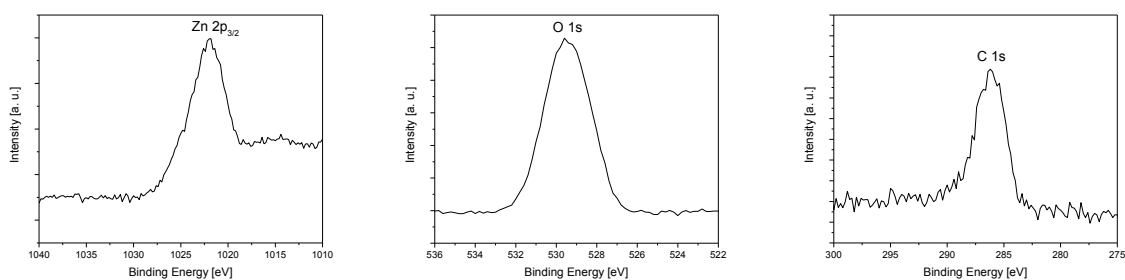

### Detailed spectra of layers **A**, **B**, **D** – **F**

**Figure S17.** *Ex situ* detailed XPS spectra of the Zn  $2p_{3/2}$  peak (left), O 1s peak (middle) and C 1s peak (right) of layer **A** obtained from **7** by CVD.

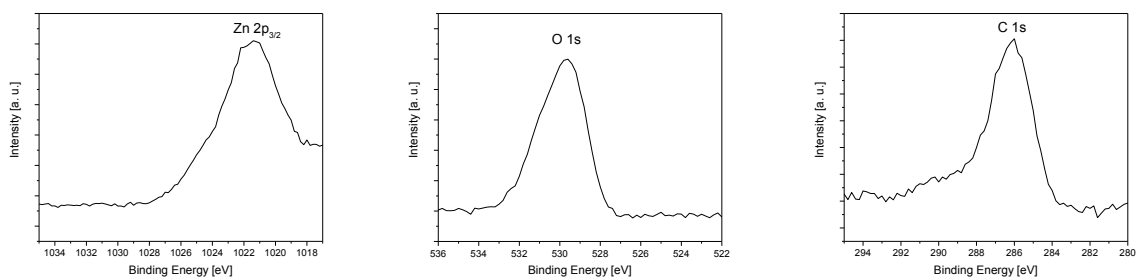

**Figure S18.** *Ex situ* detailed XPS spectra of the Zn  $2p_{3/2}$  peak (left), O 1s peak (middle) and C 1s peak (right) of layer **B** obtained from **7** by CVD.

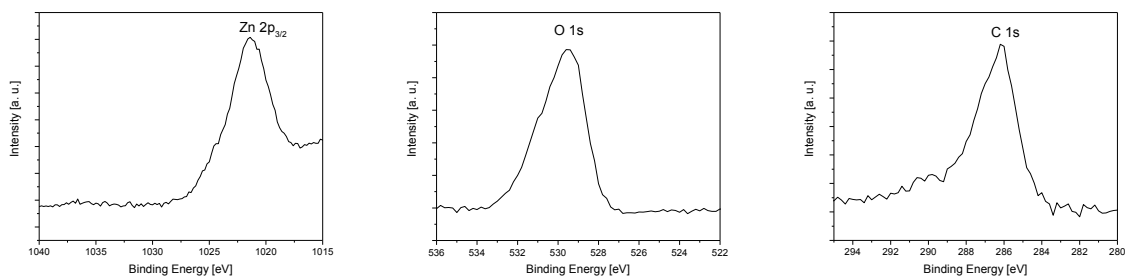

**Figure S19.** *Ex situ* detailed XPS spectra of the Zn  $2p_{3/2}$  peak (left), O 1s peak (middle) and C 1s peak (right) of layer **D** obtained from **7** by CVD.

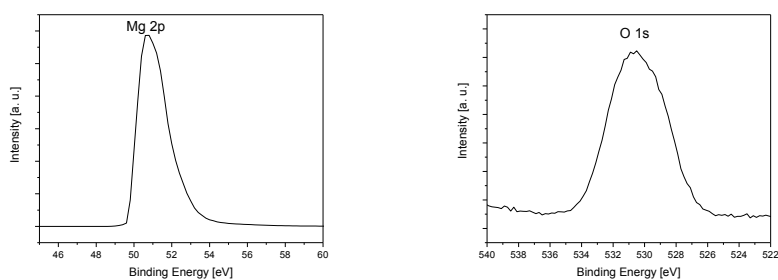

**Figure S20.** *Ex situ* detailed XPS spectra of the Mg 2p peak (left) and O 1s peak (right) of layer **E**

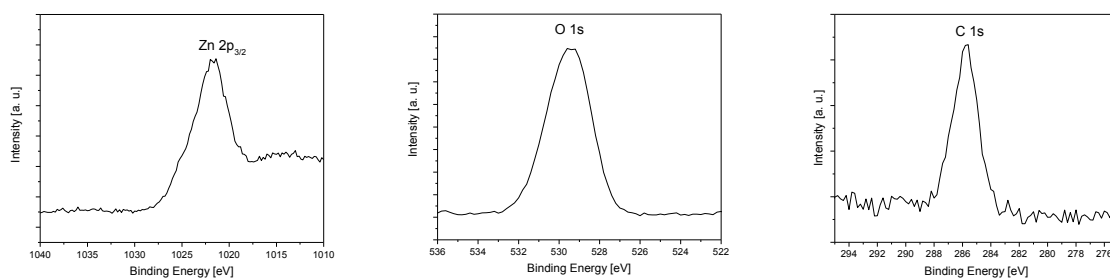

obtained from **5** by spin-coating.

**Figure S21.** *Ex situ* detailed XPS spectra of the Zn 2p<sub>3/2</sub> peak (left), O 1s peak (middle) and C 1s peak (right) of layer **F** obtained from **7** by spin-coating.

## GIXRD Spectra

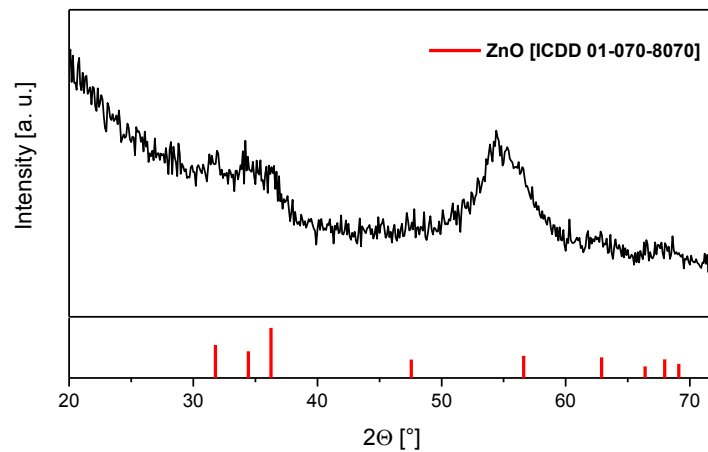

**Figure S22.** GIXRD spectra of layer **A** with reflections of ZnO (red), applied deposition parameters are given in Table 3.

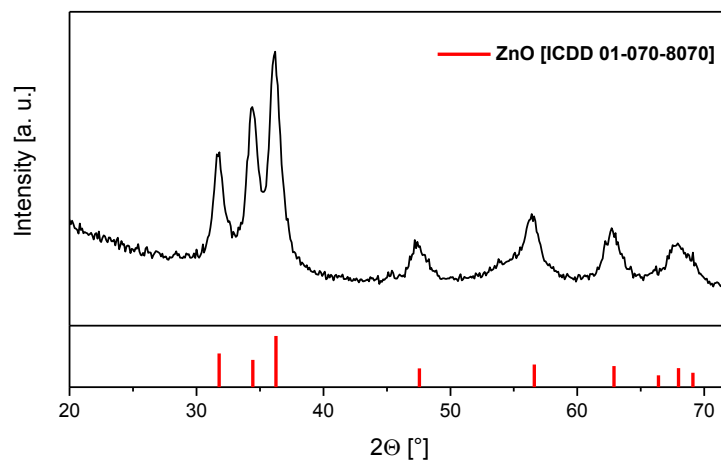

**Figure S23.** GIXRD spectra of layer **B** with reflections of ZnO (red), applied deposition parameters are given in Table 3.

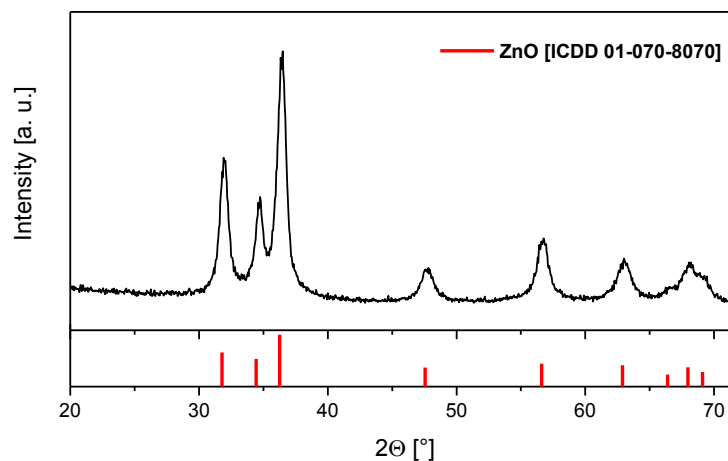

**Figure S24.** GIXRD spectra of layer **C** with reflections of ZnO (red), applied deposition parameters are given in Table 3.

**Table S1.** Elemental composition of the surface of layers **A – F**.

| Layer    | Surface composition [mol%] |      |      |      |     |
|----------|----------------------------|------|------|------|-----|
|          | Zn                         | Mg   | O    | C    | F   |
| <b>A</b> | 12.2                       |      | 29.8 | 58.0 |     |
| <b>B</b> | 30.0                       |      | 34.1 | 37.9 |     |
| <b>C</b> | 28.4                       |      | 36.0 | 35.6 |     |
| <b>D</b> | 32.5                       |      | 35.0 | 32.5 |     |
| <b>E</b> |                            | 30.9 | 45.2 | 17.6 | 6.3 |
| <b>F</b> | 30.5                       |      | 51.1 | 18.4 |     |

# NMR Spectra

$^1\text{H}$  NMR spectrum of **3** in  $\text{CDCl}_3$ .

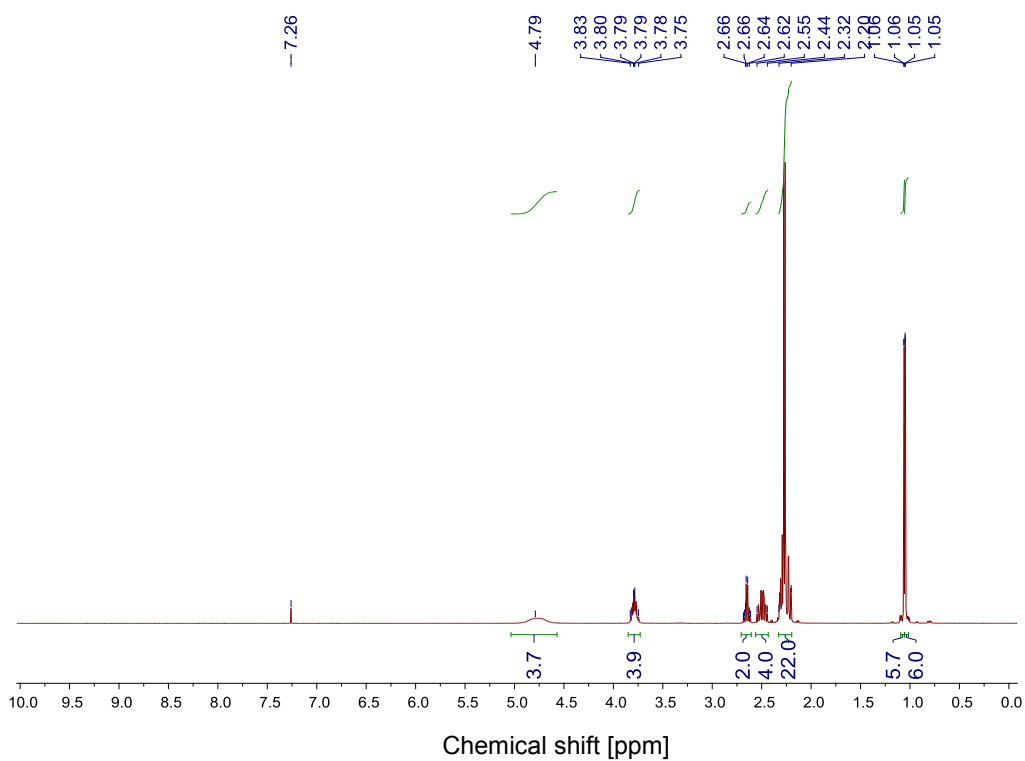

$^{13}\text{C}$  NMR spectrum of **3** in  $\text{CDCl}_3$ .

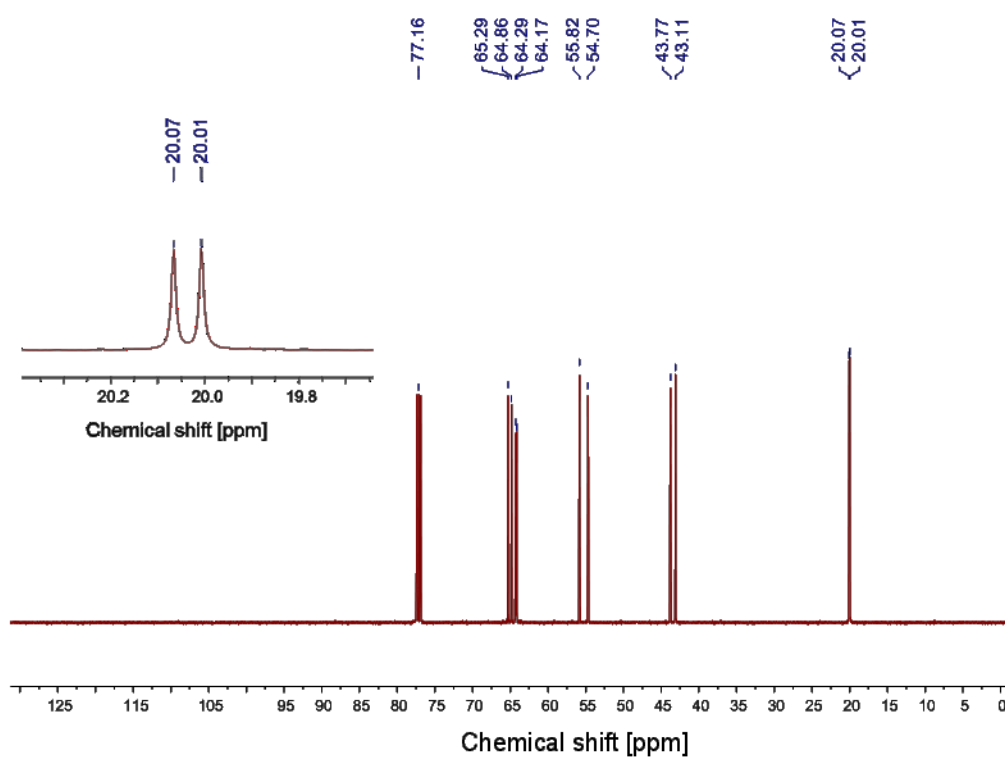

$^1\text{H}$  NMR spectrum of **5** in  $\text{CDCl}_3$ .

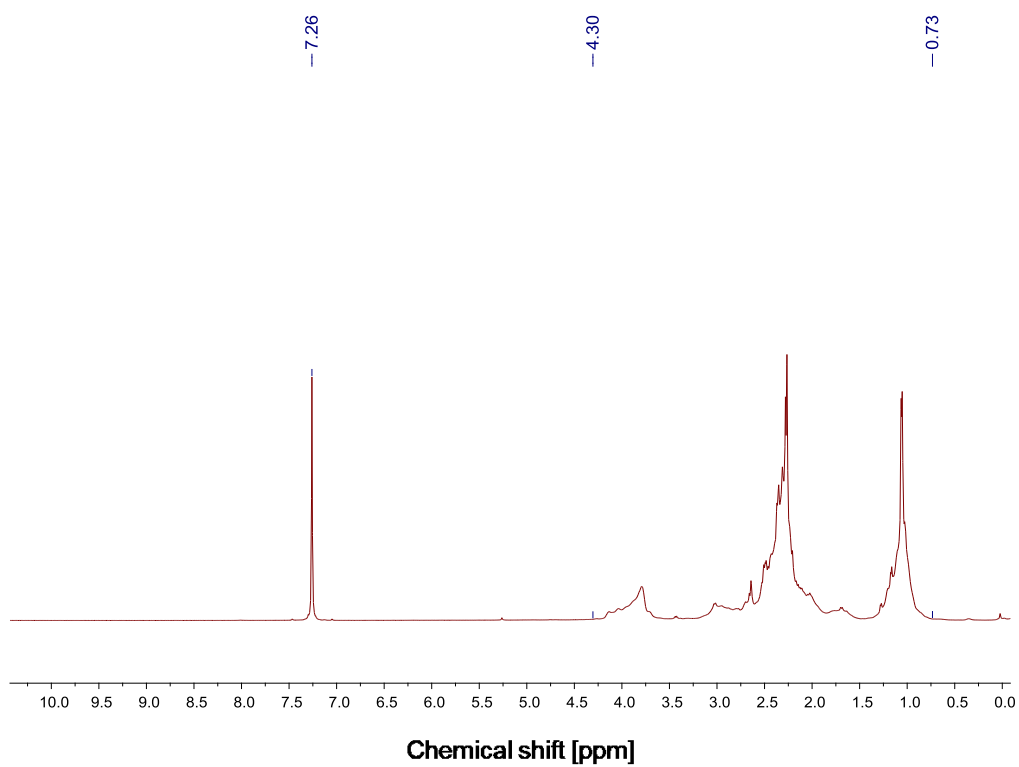

$^{13}\text{C}$  NMR spectrum of **5** in  $\text{CDCl}_3$ .

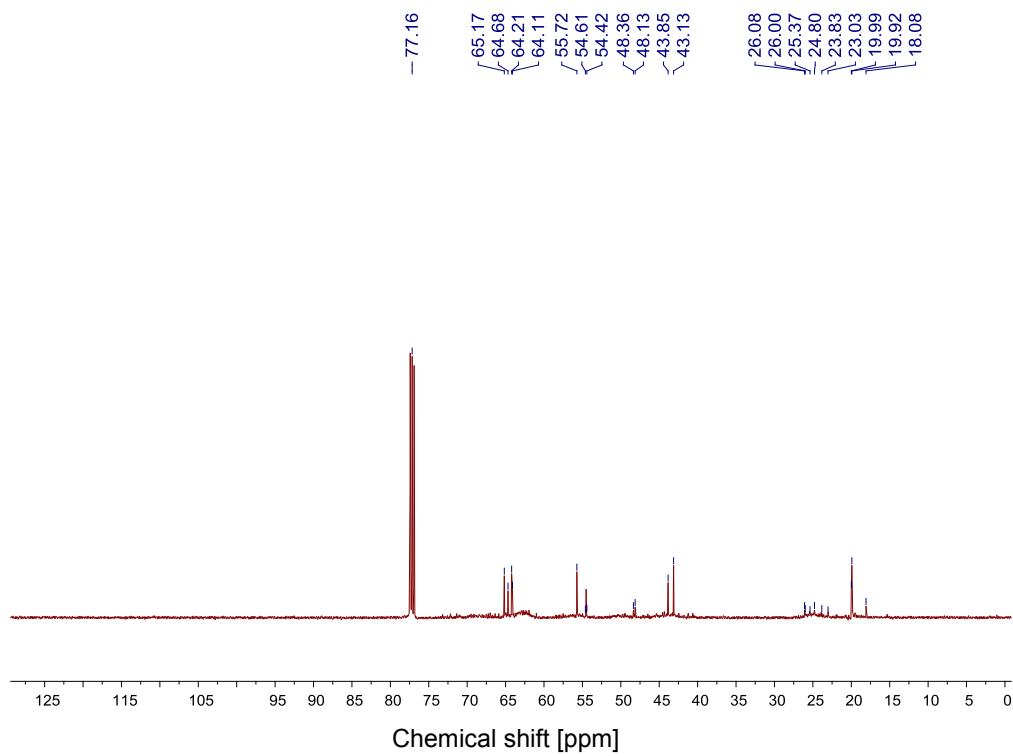

HMQC NMR spectrum of **5** in CDCl<sub>3</sub>.

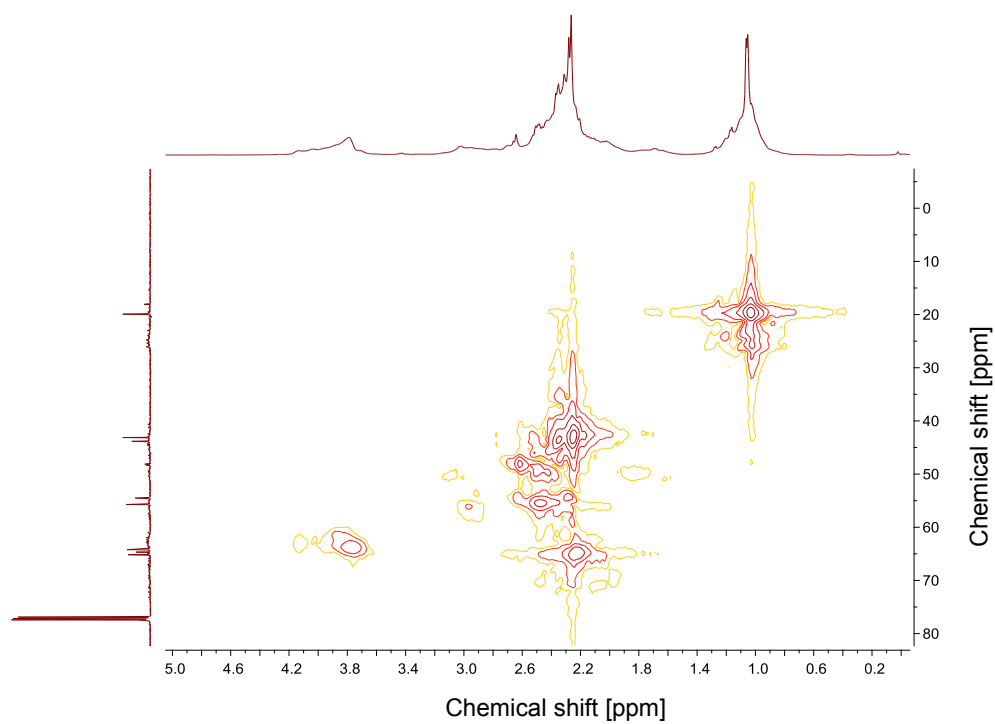

HMBC NMR spectrum of **5** in CDCl<sub>3</sub>.

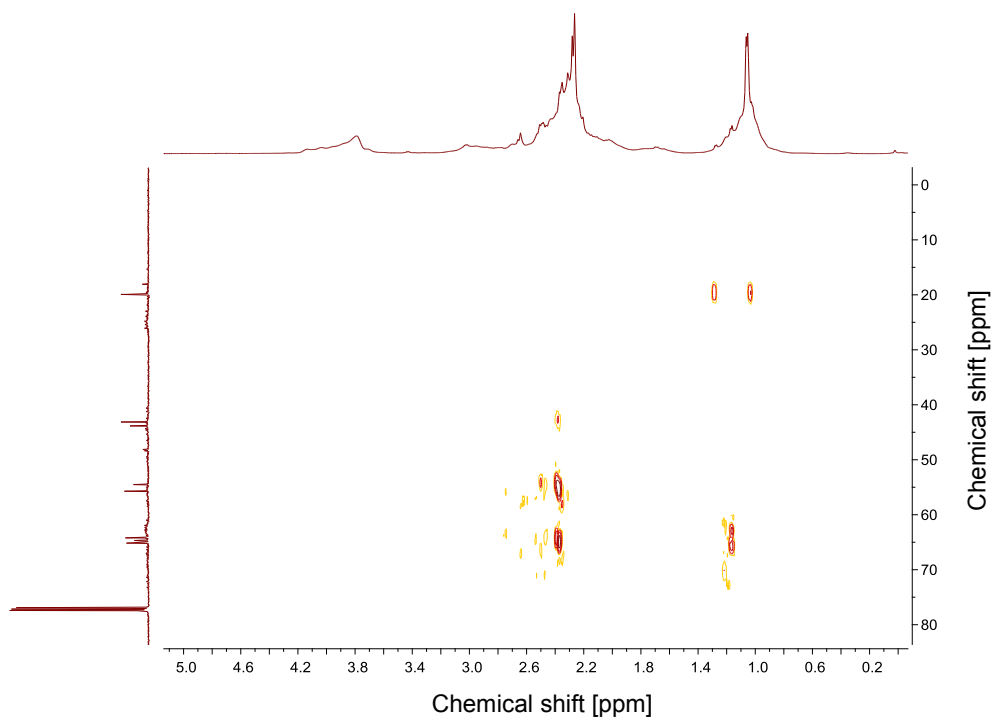

$^1\text{H}$  NMR spectrum of **7** in  $\text{C}_6\text{D}_6$

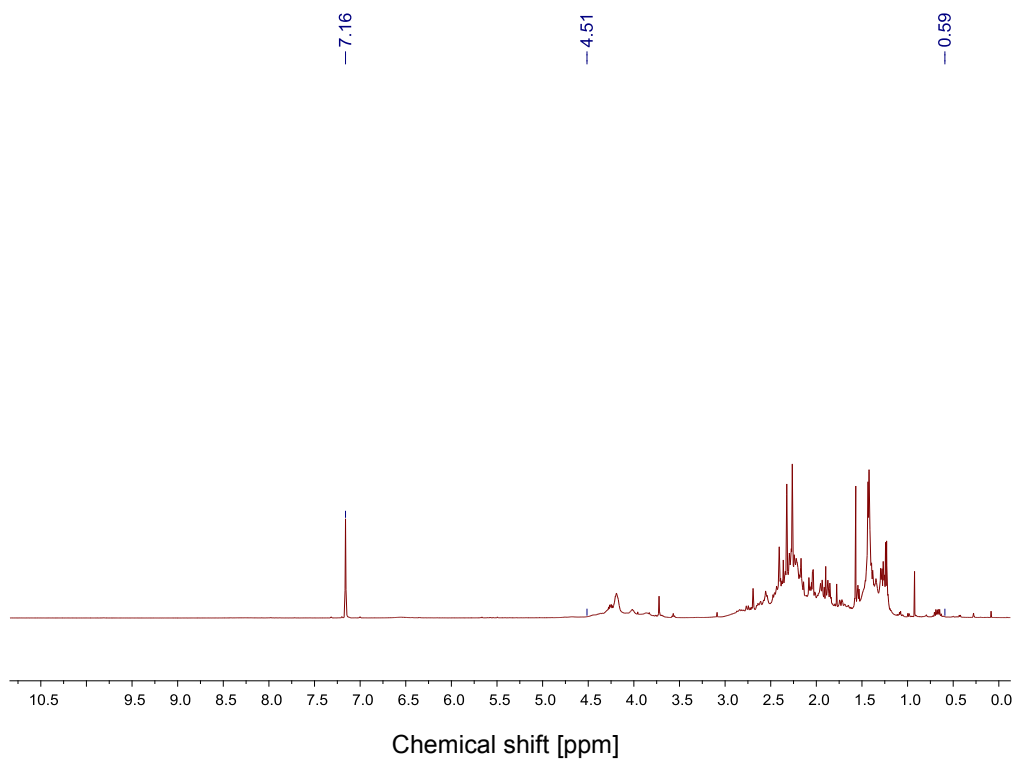

$^{13}\text{C}$  NMR spectrum of **7** in  $\text{C}_6\text{D}_6$

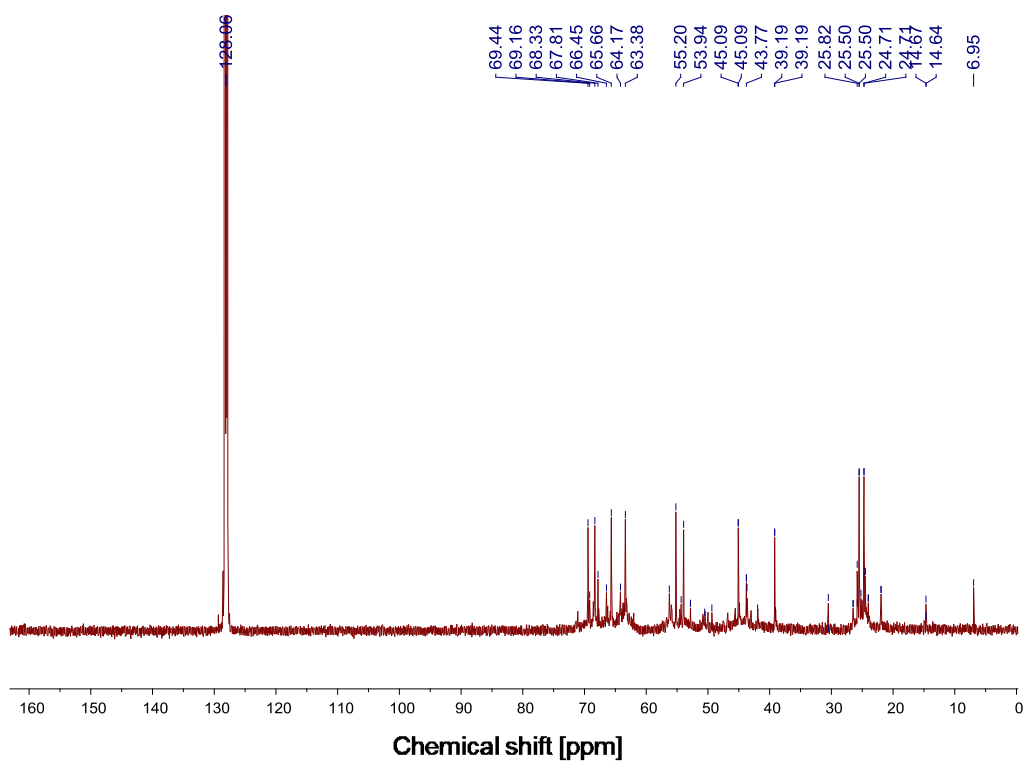



HMQC NMR spectrum of 7 in C<sub>6</sub>D<sub>6</sub>.

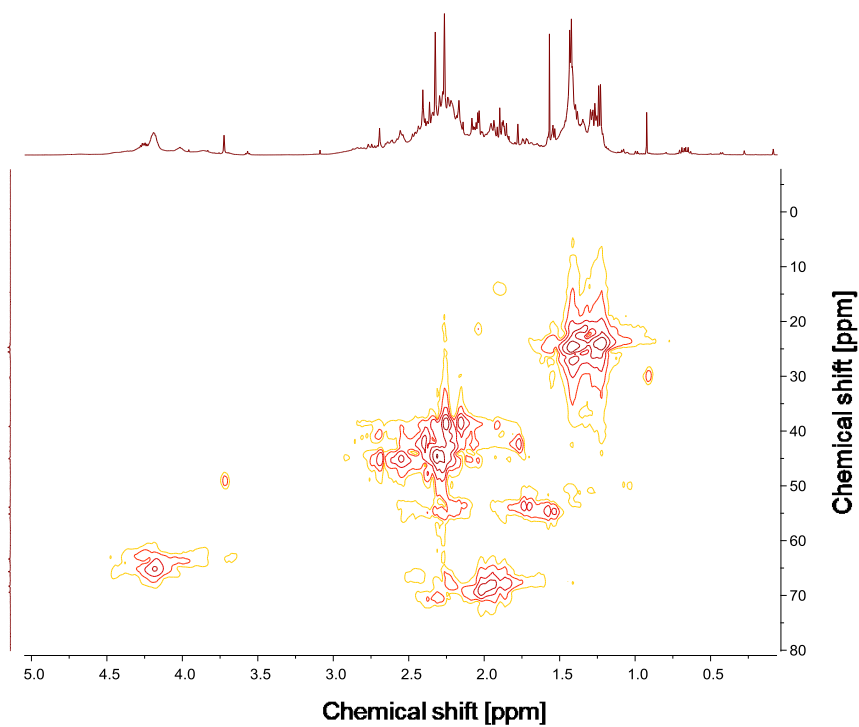

HMBC NMR spectrum of 7 in C<sub>6</sub>D<sub>6</sub>.

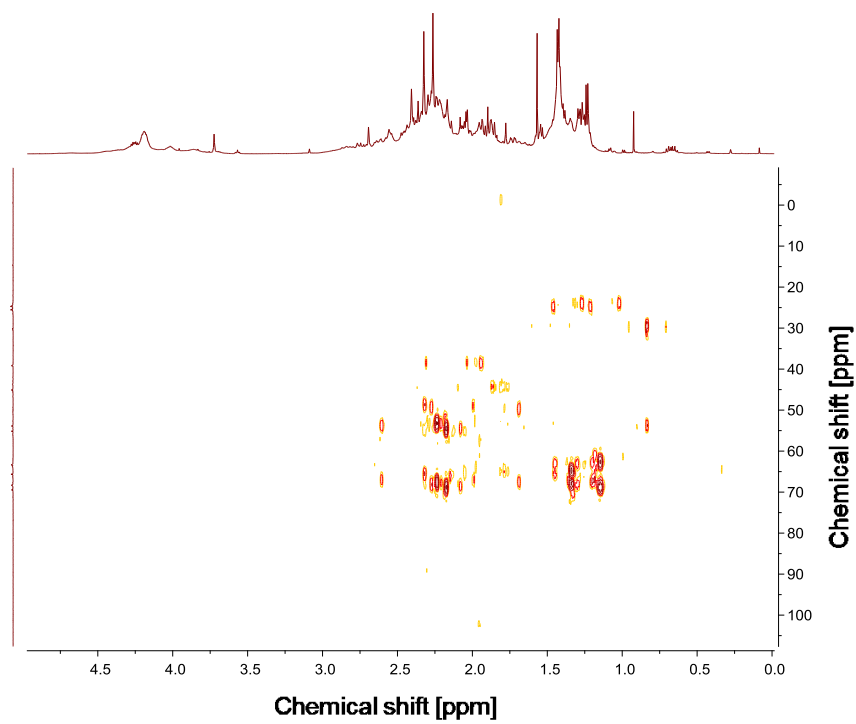

## IR Spectra

IR spectrum of **3** (CHCl<sub>3</sub>, NaCl).

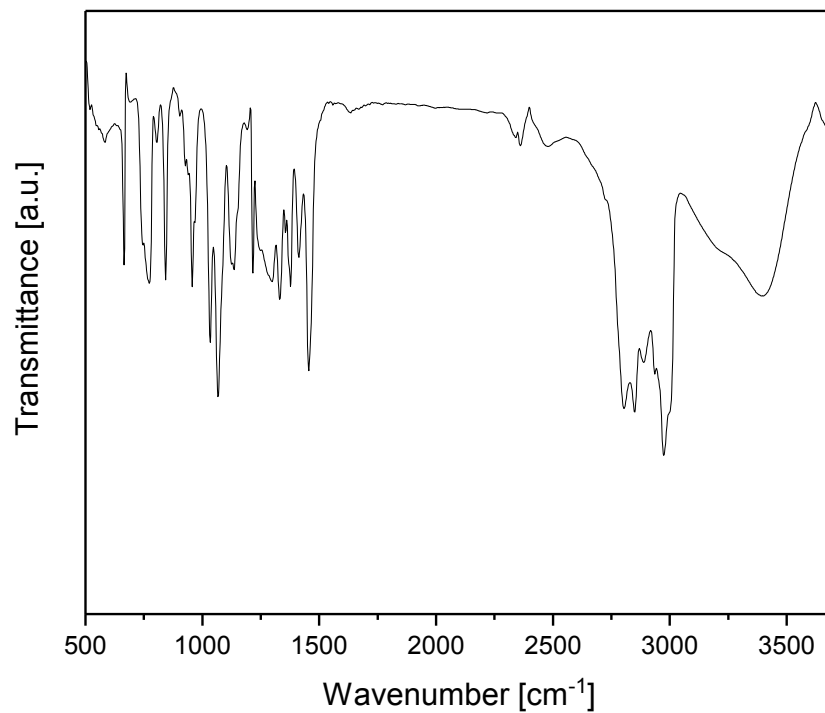

IR spectrum of **5** (KBr).

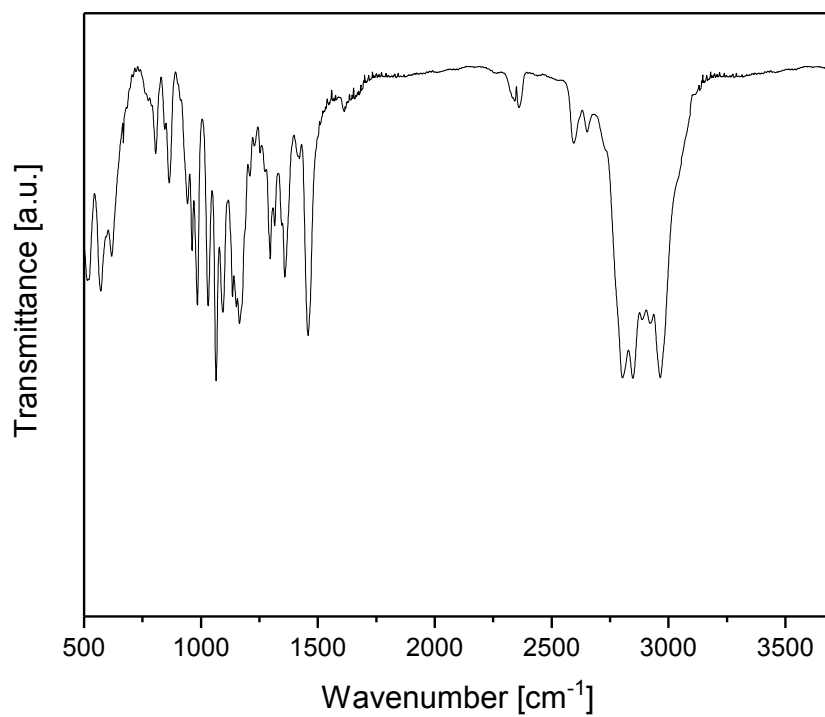

IR spectrum of 7 (KBr).

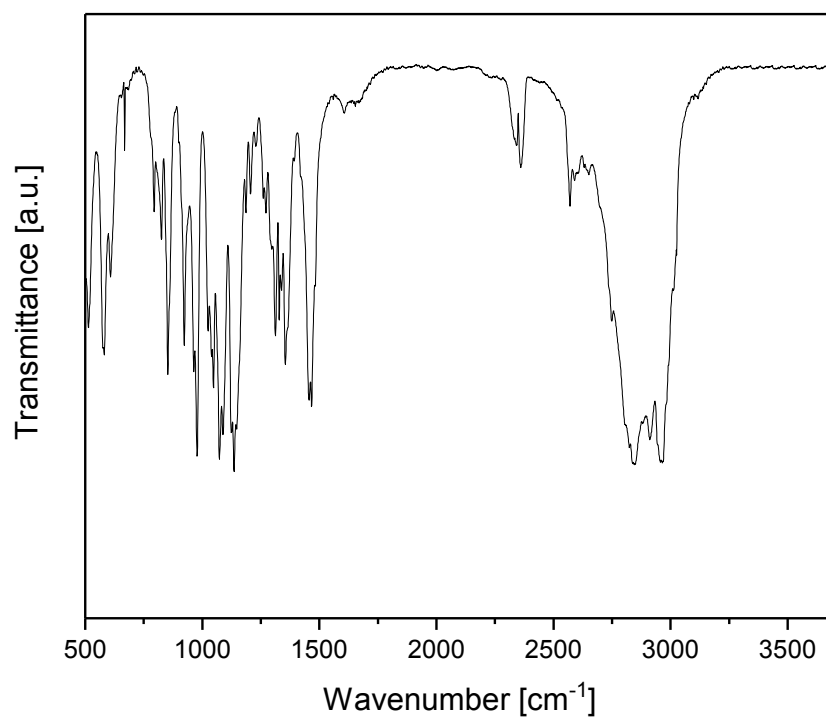

Supplement: c9ra00585d1.pdf [file c9ra00585d1.pdf]
